# Supplementary material for: Developmental stability of general and specific factors of psychopathology from early childhood to adolescence: dynamic mutualism or p‐differentiation?
Source: PubMed Central journal article supplement (PMC6001631; doi:10.1111/jcpp.12849), 2017-12-02
Supplement: JCPP-59-667-s001.pdf [file JCPP-59-667-s001.pdf]

Table S1. Means (SD), construct reliability (*H*), and standardised factor scores at age 2

|           | <i>p</i> | INT         | EXT          | ATT         |
|-----------|----------|-------------|--------------|-------------|
| Mean (SD) |          | 8.42 (5.74) | 12.05 (6.18) | 2.69 (1.62) |
| <i>H</i>  | 0.951    | 0.903       | 0.723        | 0.588       |
| CBCL21    | 0.377    | 0.227       |              |             |
| CBCL46    | 0.368    | 0.431       |              |             |
| CBCL51    | 0.366    | 0.234       |              |             |
| CBCL79    | 0.260    | 0.362       |              |             |
| CBCL82    | 0.700    | 0.183       |              |             |
| CBCL83    | 0.547    | 0.309       |              |             |
| CBCL92    | 0.311    | 0.280       |              |             |
| CBCL97    | 0.575    | -0.011      |              |             |
| CBCL99    | 0.333    | 0.596       |              |             |
| CBCL10    | 0.416    | 0.386       |              |             |
| CBCL33    | 0.324    | 0.304       |              |             |
| CBCL37    | 0.451    | 0.416       |              |             |
| CBCL43    | 0.473    | 0.453       |              |             |
| CBCL47    | 0.587    | 0.224       |              |             |
| CBCL68    | 0.280    | 0.379       |              |             |
| CBCL87    | 0.479    | 0.503       |              |             |
| CBCL90    | 0.385    | 0.640       |              |             |
| CBCL01    | 0.326    | 0.302       |              |             |
| CBCL07    | 0.131    | 0.265       |              |             |
| CBCL12    | 0.167    | 0.621       |              |             |
| CBCL19    | 0.310    | 0.130       |              |             |
| CBCL24    | 0.311    | 0.136       |              |             |
| CBCL39    | 0.178    | 0.532       |              |             |
| CBCL45    | 0.440    | 0.713       |              |             |
| CBCL52    | 0.107    | 0.592       |              |             |
| CBCL78    | 0.368    | 0.495       |              |             |
| CBCL86    | 0.214    | 0.434       |              |             |
| CBCL93    | 0.331    | 0.455       |              |             |
| CBCL02    | 0.384    | 0.210       |              |             |
| CBCL04    | 0.281    | 0.214       |              |             |
| CBCL23    | 0.513    | 0.125       |              |             |
| CBCL62    | 0.467    | 0.430       |              |             |
| CBCL67    | 0.522    | 0.372       |              |             |
| CBCL70    | 0.443    | 0.501       |              |             |
| CBCL71    | 0.388    | 0.561       |              |             |
| CBCL98    | 0.384    | 0.618       |              |             |
| CBCL08    | 0.563    |             | 0.359        |             |
| CBCL15    | 0.484    |             | 0.555        |             |
| CBCL16    | 0.552    |             | 0.476        |             |
| CBCL18    | 0.510    |             | 0.265        |             |
| CBCL20    | 0.470    |             | 0.636        |             |

|        |       |       |        |
|--------|-------|-------|--------|
| CBCL27 | 0.475 | 0.369 |        |
| CBCL29 | 0.632 | 0.075 |        |
| CBCL35 | 0.539 | 0.191 |        |
| CBCL40 | 0.480 | 0.376 |        |
| CBCL42 | 0.396 | 0.254 |        |
| CBCL44 | 0.739 | 0.005 |        |
| CBCL53 | 0.557 | 0.227 |        |
| CBCL58 | 0.509 | 0.374 |        |
| CBCL66 | 0.639 | 0.046 |        |
| CBCL69 | 0.534 | 0.254 |        |
| CBCL81 | 0.686 | 0.187 |        |
| CBCL85 | 0.559 | 0.261 |        |
| CBCL88 | 0.700 | 0.332 |        |
| CBCL96 | 0.665 | 0.086 |        |
| CBCL05 | 0.522 |       | 0.689  |
| CBCL06 | 0.562 |       | 0.541  |
| CBCL56 | 0.583 |       | -0.028 |
| CBCL59 | 0.567 |       | 0.302  |
| CBCL95 | 0.331 |       | -0.081 |

---

Table S2. Means (SD), construct reliability (*H*), and standardised factor scores at age 3

|           | <i>p</i> | INT        | EXT          | ATT         |
|-----------|----------|------------|--------------|-------------|
| Mean (SD) |          | 9.41(6.18) | 11.74 (6.01) | 2.61 (1.66) |
| <i>H</i>  | 0.951    | 0.872      | 0.750        | 0.628       |
| CBCL21    | 0.479    | 0.243      |              |             |
| CBCL46    | 0.316    | 0.404      |              |             |
| CBCL51    | 0.301    | 0.357      |              |             |
| CBCL79    | 0.348    | 0.250      |              |             |
| CBCL82    | 0.733    | 0.184      |              |             |
| CBCL83    | 0.579    | 0.281      |              |             |
| CBCL92    | 0.339    | 0.345      |              |             |
| CBCL97    | 0.576    | 0.073      |              |             |
| CBCL99    | 0.336    | 0.394      |              |             |
| CBCL10    | 0.415    | 0.315      |              |             |
| CBCL33    | 0.297    | 0.315      |              |             |
| CBCL37    | 0.435    | 0.350      |              |             |
| CBCL43    | 0.487    | 0.446      |              |             |
| CBCL47    | 0.525    | 0.234      |              |             |
| CBCL68    | 0.316    | 0.312      |              |             |
| CBCL87    | 0.453    | 0.543      |              |             |
| CBCL90    | 0.500    | 0.446      |              |             |
| CBCL01    | 0.365    | 0.231      |              |             |
| CBCL07    | 0.177    | 0.224      |              |             |
| CBCL12    | 0.087    | 0.589      |              |             |
| CBCL19    | 0.279    | 0.169      |              |             |
| CBCL24    | 0.353    | 0.167      |              |             |
| CBCL39    | 0.234    | 0.387      |              |             |
| CBCL45    | 0.379    | 0.535      |              |             |
| CBCL52    | 0.118    | 0.607      |              |             |
| CBCL78    | 0.302    | 0.490      |              |             |
| CBCL86    | 0.240    | 0.387      |              |             |
| CBCL93    | 0.261    | 0.450      |              |             |
| CBCL02    | 0.389    | 0.058      |              |             |
| CBCL04    | 0.324    | 0.312      |              |             |
| CBCL23    | 0.520    | 0.182      |              |             |
| CBCL62    | 0.475    | 0.434      |              |             |
| CBCL67    | 0.436    | 0.453      |              |             |
| CBCL70    | 0.387    | 0.459      |              |             |
| CBCL71    | 0.403    | 0.507      |              |             |
| CBCL98    | 0.380    | 0.471      |              |             |
| CBCL08    | 0.567    |            | 0.284        |             |
| CBCL15    | 0.376    |            | 0.600        |             |
| CBCL16    | 0.579    |            | 0.375        |             |
| CBCL18    | 0.419    |            | 0.412        |             |
| CBCL20    | 0.523    |            | 0.502        |             |

|        |       |       |        |
|--------|-------|-------|--------|
| CBCL27 | 0.501 | 0.227 |        |
| CBCL29 | 0.673 | 0.145 |        |
| CBCL35 | 0.530 | 0.411 |        |
| CBCL40 | 0.383 | 0.565 |        |
| CBCL42 | 0.403 | 0.400 |        |
| CBCL44 | 0.681 | 0.173 |        |
| CBCL53 | 0.469 | 0.471 |        |
| CBCL58 | 0.548 | 0.291 |        |
| CBCL66 | 0.627 | 0.135 |        |
| CBCL69 | 0.514 | 0.234 |        |
| CBCL81 | 0.721 | 0.183 |        |
| CBCL85 | 0.619 | 0.264 |        |
| CBCL88 | 0.660 | 0.308 |        |
| CBCL96 | 0.688 | 0.073 |        |
| CBCL05 | 0.559 |       | 0.718  |
| CBCL06 | 0.605 |       | 0.580  |
| CBCL56 | 0.513 |       | 0.050  |
| CBCL59 | 0.603 |       | 0.299  |
| CBCL95 | 0.431 |       | -0.140 |

---

Table S3. Means (SD), construct reliability (H), and standardised factor scores at age 5

|           | <i>p</i> | INT         | EXT         | ATT          |
|-----------|----------|-------------|-------------|--------------|
| Mean (SD) |          | 5.10 (4.29) | 7.05 (5.67) | 1.811 (1.70) |
| <i>H</i>  | 0.960    | 0.808       | 0.817       | 0.649        |
| CBCL14    | 0.513    | 0.110       |             |              |
| CBCL29    | 0.192    | 0.234       |             |              |
| CBCL30    | 0.395    | 0.146       |             |              |
| CBCL31    | 0.459    | 0.279       |             |              |
| CBCL32    | 0.243    | 0.438       |             |              |
| CBCL33    | 0.486    | 0.196       |             |              |
| CBCL35    | 0.482    | 0.346       |             |              |
| CBCL45    | 0.544    | 0.306       |             |              |
| CBCL50    | 0.525    | 0.458       |             |              |
| CBCL52    | 0.473    | 0.317       |             |              |
| CBCL71    | 0.342    | 0.448       |             |              |
| CBCL91    | 0.449    | 0.311       |             |              |
| CBCL112   | 0.369    | 0.537       |             |              |
| CBCL42    | 0.284    | 0.362       |             |              |
| CBCL65    | 0.512    | 0.245       |             |              |
| CBCL69    | 0.496    | 0.321       |             |              |
| CBCL75    | 0.159    | 0.483       |             |              |
| CBCL102   | 0.418    | 0.295       |             |              |
| CBCL103   | 0.607    | 0.394       |             |              |
| CBCL111   | 0.390    | 0.581       |             |              |
| CBCL47    | 0.325    | 0.157       |             |              |
| CBCL49    | 0.188    | 0.165       |             |              |
| CBCL54    | 0.532    | 0.251       |             |              |
| CBCL56A   | 0.427    | 0.304       |             |              |
| CBCL56B   | 0.375    | 0.336       |             |              |
| CBCL56C   | 0.446    | 0.442       |             |              |
| CBCL56D   | 0.168    | 0.140       |             |              |
| CBCL56E   | 0.283    | 0.171       |             |              |
| CBCL56F   | 0.383    | 0.413       |             |              |
| CBCL56G   | 0.334    | 0.295       |             |              |
| CBCL26    | 0.542    |             | 0.242       |              |
| CBCL39    | 0.469    |             | 0.058       |              |
| CBCL43    | 0.542    |             | 0.232       |              |
| CBCL63    | 0.457    |             | -0.064      |              |
| CBCL67    | 0.317    |             | -0.015      |              |
| CBCL73    | 0.244    |             | -0.028      |              |
| CBCL81    | 0.513    |             | 0.263       |              |
| CBCL82    | 0.549    |             | 0.113       |              |
| CBCL90    | 0.461    |             | 0.317       |              |
| CBCL96    | 0.335    |             | 0.084       |              |
| CBCL106   | 0.498    |             | 0.173       |              |

|         |       |        |       |
|---------|-------|--------|-------|
| CBCL03  | 0.558 | 0.128  |       |
| CBCL16  | 0.610 | 0.254  |       |
| CBCL19  | 0.681 | 0.055  |       |
| CBCL20  | 0.510 | 0.732  |       |
| CBCL21  | 0.474 | 0.829  |       |
| CBCL22  | 0.629 | 0.354  |       |
| CBCL23  | 0.479 | 0.227  |       |
| CBCL37  | 0.591 | 0.246  |       |
| CBCL57  | 0.537 | 0.364  |       |
| CBCL68  | 0.657 | 0.172  |       |
| CBCL86  | 0.686 | 0.098  |       |
| CBCL87  | 0.727 | 0.070  |       |
| CBCL88  | 0.688 | -0.192 |       |
| CBCL89  | 0.621 | -0.122 |       |
| CBCL94  | 0.543 | 0.133  |       |
| CBCL95  | 0.632 | 0.193  |       |
| CBCL97  | 0.627 | 0.294  |       |
| CBCL104 | 0.639 | 0.067  |       |
| CBCL01  | 0.468 |        | 0.138 |
| CBCL08  | 0.585 |        | 0.739 |
| CBCL10  | 0.588 |        | 0.420 |
| CBCL13  | 0.556 |        | 0.198 |
| CBCL17  | 0.466 |        | 0.107 |
| CBCL41  | 0.681 |        | 0.144 |
| CBCL61  | 0.352 |        | 0.480 |
| CBCL80  | 0.462 |        | 0.193 |

---

Table S4. Means (SD), construct reliability (H), and standardised factor scores at age 6

|           | <i>p</i> | INT         | EXT         | ATT         |
|-----------|----------|-------------|-------------|-------------|
| Mean (SD) |          | 5.53 (4.44) | 6.45 (5.49) | 2.46 (2.28) |
| <i>H</i>  | 0.957    | 0.844       | 0.703       | 0.641       |
| CBCL14    | 0.470    | 0.244       |             |             |
| CBCL29    | 0.216    | 0.349       |             |             |
| CBCL30    | 0.314    | 0.338       |             |             |
| CBCL31    | 0.374    | 0.297       |             |             |
| CBCL32    | 0.169    | 0.346       |             |             |
| CBCL33    | 0.513    | 0.150       |             |             |
| CBCL35    | 0.467    | 0.329       |             |             |
| CBCL45    | 0.515    | 0.264       |             |             |
| CBCL50    | 0.380    | 0.516       |             |             |
| CBCL52    | 0.420    | 0.429       |             |             |
| CBCL71    | 0.362    | 0.435       |             |             |
| CBCL91    | 0.433    | 0.247       |             |             |
| CBCL112   | 0.326    | 0.503       |             |             |
| CBCL42    | 0.279    | 0.309       |             |             |
| CBCL65    | 0.384    | 0.300       |             |             |
| CBCL69    | 0.431    | 0.257       |             |             |
| CBCL75    | 0.175    | 0.304       |             |             |
| CBCL102   | 0.349    | 0.253       |             |             |
| CBCL103   | 0.518    | 0.353       |             |             |
| CBCL111   | 0.380    | 0.451       |             |             |
| CBCL47    | 0.328    | 0.315       |             |             |
| CBCL49    | 0.188    | 0.239       |             |             |
| CBCL51    | 0.231    | 0.238       |             |             |
| CBCL54    | 0.447    | 0.281       |             |             |
| CBCL56A   | 0.157    | 0.447       |             |             |
| CBCL56B   | 0.278    | 0.429       |             |             |
| CBCL56C   | 0.241    | 0.660       |             |             |
| CBCL56D   | 0.096    | 0.226       |             |             |
| CBCL56E   | 0.280    | 0.283       |             |             |
| CBCL56F   | 0.235    | 0.579       |             |             |
| CBCL56G   | 0.279    | 0.506       |             |             |
| CBCL26    | 0.547    |             | 0.232       |             |
| CBCL39    | 0.401    |             | 0.246       |             |
| CBCL43    | 0.600    |             | 0.176       |             |
| CBCL63    | 0.430    |             | -0.062      |             |
| CBCL67    | 0.546    |             | 0.018       |             |
| CBCL81    | 0.508    |             | 0.325       |             |
| CBCL82    | 0.315    |             | 0.417       |             |
| CBCL90    | 0.445    |             | 0.419       |             |
| CBCL106   | 0.362    |             | 0.421       |             |
| CBCL03    | 0.587    |             | -0.147      |             |

|         |       |        |       |
|---------|-------|--------|-------|
| CBCL16  | 0.645 | 0.342  |       |
| CBCL19  | 0.639 | -0.186 |       |
| CBCL20  | 0.675 | 0.446  |       |
| CBCL21  | 0.654 | 0.549  |       |
| CBCL22  | 0.741 | 0.110  |       |
| CBCL23  | 0.556 | 0.276  |       |
| CBCL37  | 0.595 | 0.328  |       |
| CBCL57  | 0.621 | 0.299  |       |
| CBCL68  | 0.687 | -0.027 |       |
| CBCL86  | 0.664 | -0.076 |       |
| CBCL87  | 0.607 | -0.033 |       |
| CBCL88  | 0.645 | -0.172 |       |
| CBCL89  | 0.476 | 0.129  |       |
| CBCL94  | 0.538 | 0.118  |       |
| CBCL95  | 0.654 | -0.030 |       |
| CBCL97  | 0.530 | 0.407  |       |
| CBCL104 | 0.638 | 0.036  |       |
| CBCL01  | 0.387 |        | 0.237 |
| CBCL08  | 0.563 |        | 0.577 |
| CBCL10  | 0.601 |        | 0.343 |
| CBCL13  | 0.454 |        | 0.542 |
| CBCL17  | 0.348 |        | 0.402 |
| CBCL41  | 0.689 |        | 0.106 |
| CBCL61  | 0.484 |        | 0.374 |
| CBCL80  | 0.442 |        | 0.484 |

---

Table S5. Means (SD), construct reliability (H), and standardised factor scores at age 8

|           | <i>p</i> | INT         | EXT         | ATT         |
|-----------|----------|-------------|-------------|-------------|
| Mean (SD) |          | 5.63 (5.03) | 5.99 (5.42) | 2.48 (2.38) |
| <i>H</i>  | 0.963    | 0.863       | 0.786       | 0.649       |
| CBCL14    | 0.581    | 0.145       |             |             |
| CBCL29    | 0.267    | 0.279       |             |             |
| CBCL30    | 0.328    | 0.314       |             |             |
| CBCL31    | 0.347    | 0.486       |             |             |
| CBCL32    | 0.152    | 0.521       |             |             |
| CBCL33    | 0.531    | 0.186       |             |             |
| CBCL35    | 0.556    | 0.429       |             |             |
| CBCL45    | 0.578    | 0.357       |             |             |
| CBCL50    | 0.485    | 0.517       |             |             |
| CBCL52    | 0.360    | 0.542       |             |             |
| CBCL71    | 0.395    | 0.512       |             |             |
| CBCL91    | 0.518    | 0.223       |             |             |
| CBCL112   | 0.329    | 0.593       |             |             |
| CBCL42    | 0.256    | 0.277       |             |             |
| CBCL65    | 0.462    | 0.244       |             |             |
| CBCL69    | 0.530    | 0.295       |             |             |
| CBCL75    | 0.170    | 0.423       |             |             |
| CBCL102   | 0.282    | 0.185       |             |             |
| CBCL103   | 0.581    | 0.465       |             |             |
| CBCL111   | 0.392    | 0.409       |             |             |
| CBCL47    | 0.311    | 0.285       |             |             |
| CBCL49    | 0.183    | 0.388       |             |             |
| CBCL51    | 0.231    | 0.410       |             |             |
| CBCL54    | 0.473    | 0.359       |             |             |
| CBCL56A   | 0.253    | 0.490       |             |             |
| CBCL56B   | 0.303    | 0.386       |             |             |
| CBCL56C   | 0.340    | 0.562       |             |             |
| CBCL56D   | 0.395    | 0.136       |             |             |
| CBCL56E   | 0.214    | 0.293       |             |             |
| CBCL56F   | 0.247    | 0.587       |             |             |
| CBCL56G   | 0.334    | 0.247       |             |             |
| CBCL26    | 0.567    |             | 0.263       |             |
| CBCL39    | 0.536    |             | 0.266       |             |
| CBCL43    | 0.617    |             | 0.287       |             |
| CBCL63    | 0.429    |             | 0.067       |             |
| CBCL67    | 0.309    |             | -0.087      |             |
| CBCL81    | 0.367    |             | 0.365       |             |
| CBCL82    | 0.356    |             | 0.412       |             |
| CBCL90    | 0.534    |             | 0.405       |             |
| CBCL96    | 0.422    |             | 0.264       |             |
| CBCL03    | 0.576    |             | 0.185       |             |

|         |       |        |       |
|---------|-------|--------|-------|
| CBCL16  | 0.632 | 0.364  |       |
| CBCL19  | 0.622 | 0.020  |       |
| CBCL20  | 0.580 | 0.604  |       |
| CBCL21  | 0.574 | 0.697  |       |
| CBCL22  | 0.671 | 0.320  |       |
| CBCL23  | 0.520 | 0.391  |       |
| CBCL37  | 0.568 | 0.373  |       |
| CBCL57  | 0.534 | 0.387  |       |
| CBCL68  | 0.676 | 0.094  |       |
| CBCL86  | 0.771 | -0.062 |       |
| CBCL87  | 0.798 | -0.189 |       |
| CBCL88  | 0.731 | -0.153 |       |
| CBCL89  | 0.626 | 0.058  |       |
| CBCL94  | 0.502 | 0.298  |       |
| CBCL95  | 0.704 | 0.148  |       |
| CBCL97  | 0.659 | 0.416  |       |
| CBCL104 | 0.609 | 0.206  |       |
| CBCL01  | 0.483 |        | 0.260 |
| CBCL08  | 0.542 |        | 0.628 |
| CBCL10  | 0.547 |        | 0.437 |
| CBCL13  | 0.469 |        | 0.497 |
| CBCL17  | 0.411 |        | 0.436 |
| CBCL41  | 0.702 |        | 0.214 |
| CBCL61  | 0.512 |        | 0.306 |
| CBCL80  | 0.476 |        | 0.386 |

---

Table S6. Means (SD), construct reliability (H), and standardised factor scores at age 9

|           | <i>p</i> | INT         | EXT         | ATT         |
|-----------|----------|-------------|-------------|-------------|
| Mean (SD) |          | 5.31 (4.91) | 5.54 (5.16) | 2.40 (2.39) |
| <i>H</i>  | 0.964    | 0.829       | 0.760       | 0.658       |
| CBCL14    | 0.619    | 0.144       |             |             |
| CBCL29    | 0.318    | 0.348       |             |             |
| CBCL30    | 0.403    | 0.385       |             |             |
| CBCL31    | 0.413    | 0.407       |             |             |
| CBCL32    | 0.205    | 0.409       |             |             |
| CBCL33    | 0.611    | 0.125       |             |             |
| CBCL35    | 0.510    | 0.360       |             |             |
| CBCL45    | 0.626    | 0.284       |             |             |
| CBCL50    | 0.542    | 0.427       |             |             |
| CBCL52    | 0.356    | 0.500       |             |             |
| CBCL71    | 0.438    | 0.424       |             |             |
| CBCL91    | 0.568    | 0.122       |             |             |
| CBCL112   | 0.377    | 0.518       |             |             |
| CBCL42    | 0.434    | 0.236       |             |             |
| CBCL65    | 0.558    | 0.156       |             |             |
| CBCL69    | 0.574    | 0.054       |             |             |
| CBCL75    | 0.207    | 0.352       |             |             |
| CBCL102   | 0.413    | 0.270       |             |             |
| CBCL103   | 0.654    | 0.293       |             |             |
| CBCL111   | 0.494    | 0.377       |             |             |
| CBCL47    | 0.327    | 0.339       |             |             |
| CBCL49    | 0.294    | 0.307       |             |             |
| CBCL51    | 0.437    | 0.294       |             |             |
| CBCL54    | 0.411    | 0.286       |             |             |
| CBCL56A   | 0.375    | 0.414       |             |             |
| CBCL56B   | 0.327    | 0.369       |             |             |
| CBCL56C   | 0.377    | 0.606       |             |             |
| CBCL56D   | 0.298    | 0.165       |             |             |
| CBCL56E   | 0.281    | 0.143       |             |             |
| CBCL56F   | 0.286    | 0.553       |             |             |
| CBCL56G   | 0.357    | 0.464       |             |             |
| CBCL26    | 0.559    |             | 0.400       |             |
| CBCL39    | 0.451    |             | 0.329       |             |
| CBCL43    | 0.548    |             | 0.463       |             |
| CBCL63    | 0.405    |             | 0.167       |             |
| CBCL81    | 0.417    |             | 0.563       |             |
| CBCL82    | 0.335    |             | 0.252       |             |
| CBCL90    | 0.473    |             | 0.458       |             |
| CBCL96    | 0.532    |             | 0.181       |             |
| CBCL03    | 0.506    |             | 0.224       |             |
| CBCL16    | 0.622    |             | 0.338       |             |

|         |       |        |       |
|---------|-------|--------|-------|
| CBCL19  | 0.636 | 0.024  |       |
| CBCL20  | 0.537 | 0.405  |       |
| CBCL21  | 0.586 | 0.524  |       |
| CBCL22  | 0.622 | 0.343  |       |
| CBCL23  | 0.454 | 0.542  |       |
| CBCL37  | 0.561 | 0.291  |       |
| CBCL57  | 0.620 | 0.272  |       |
| CBCL68  | 0.684 | 0.102  |       |
| CBCL86  | 0.708 | -0.034 |       |
| CBCL87  | 0.729 | -0.072 |       |
| CBCL88  | 0.731 | -0.124 |       |
| CBCL89  | 0.682 | -0.008 |       |
| CBCL94  | 0.528 | 0.300  |       |
| CBCL95  | 0.696 | 0.176  |       |
| CBCL97  | 0.740 | 0.286  |       |
| CBCL104 | 0.595 | 0.035  |       |
| CBCL01  | 0.445 |        | 0.311 |
| CBCL08  | 0.557 |        | 0.602 |
| CBCL10  | 0.570 |        | 0.378 |
| CBCL13  | 0.429 |        | 0.510 |
| CBCL17  | 0.443 |        | 0.486 |
| CBCL41  | 0.626 |        | 0.276 |
| CBCL61  | 0.468 |        | 0.286 |
| CBCL80  | 0.566 |        | 0.448 |

---

Table S7. Means (SD), construct reliability (H), and standardised factor scores at age 10

|           | <i>p</i> | INT         | EXT         | ATT         |
|-----------|----------|-------------|-------------|-------------|
| Mean (SD) |          | 5.73 (5.06) | 5.31 (5.35) | 2.25 (2.43) |
| <i>H</i>  | 0.966    | 0.838       | 0.763       | 0.624       |
| CBCL14    | 0.570    | 0.168       |             |             |
| CBCL29    | 0.333    | 0.300       |             |             |
| CBCL30    | 0.323    | 0.479       |             |             |
| CBCL31    | 0.413    | 0.392       |             |             |
| CBCL32    | 0.139    | 0.333       |             |             |
| CBCL33    | 0.642    | 0.141       |             |             |
| CBCL35    | 0.566    | 0.327       |             |             |
| CBCL45    | 0.612    | 0.233       |             |             |
| CBCL50    | 0.475    | 0.418       |             |             |
| CBCL52    | 0.489    | 0.452       |             |             |
| CBCL71    | 0.405    | 0.394       |             |             |
| CBCL91    | 0.535    | 0.206       |             |             |
| CBCL112   | 0.400    | 0.534       |             |             |
| CBCL42    | 0.402    | 0.198       |             |             |
| CBCL65    | 0.508    | 0.177       |             |             |
| CBCL69    | 0.505    | 0.212       |             |             |
| CBCL75    | 0.214    | 0.408       |             |             |
| CBCL102   | 0.458    | 0.235       |             |             |
| CBCL103   | 0.663    | 0.276       |             |             |
| CBCL111   | 0.481    | 0.236       |             |             |
| CBCL47    | 0.300    | 0.378       |             |             |
| CBCL49    | 0.316    | 0.301       |             |             |
| CBCL51    | 0.252    | 0.461       |             |             |
| CBCL54    | 0.449    | 0.299       |             |             |
| CBCL56A   | 0.304    | 0.498       |             |             |
| CBCL56B   | 0.258    | 0.498       |             |             |
| CBCL56C   | 0.357    | 0.602       |             |             |
| CBCL56D   | 0.202    | 0.169       |             |             |
| CBCL56E   | 0.216    | 0.225       |             |             |
| CBCL56F   | 0.286    | 0.591       |             |             |
| CBCL56G   | 0.286    | 0.350       |             |             |
| CBCL26    | 0.599    |             | 0.189       |             |
| CBCL39    | 0.551    |             | 0.310       |             |
| CBCL43    | 0.642    |             | 0.299       |             |
| CBCL63    | 0.476    |             | 0.096       |             |
| CBCL72    | 0.400    |             | 0.415       |             |
| CBCL81    | 0.500    |             | 0.543       |             |
| CBCL82    | 0.497    |             | 0.557       |             |
| CBCL90    | 0.347    |             | 0.384       |             |
| CBCL96    | 0.395    |             | 0.281       |             |
| CBCL03    | 0.688    |             | 0.028       |             |

|         |       |        |       |
|---------|-------|--------|-------|
| CBCL16  | 0.676 | 0.333  |       |
| CBCL19  | 0.639 | -0.115 |       |
| CBCL20  | 0.611 | 0.495  |       |
| CBCL21  | 0.652 | 0.508  |       |
| CBCL22  | 0.720 | 0.209  |       |
| CBCL23  | 0.596 | 0.357  |       |
| CBCL37  | 0.562 | 0.268  |       |
| CBCL57  | 0.615 | 0.346  |       |
| CBCL68  | 0.627 | -0.097 |       |
| CBCL86  | 0.731 | -0.240 |       |
| CBCL87  | 0.728 | -0.196 |       |
| CBCL88  | 0.686 | -0.142 |       |
| CBCL89  | 0.654 | -0.010 |       |
| CBCL94  | 0.544 | 0.200  |       |
| CBCL95  | 0.720 | -0.006 |       |
| CBCL97  | 0.579 | 0.437  |       |
| CBCL104 | 0.619 | 0.073  |       |
| CBCL01  | 0.502 |        | 0.199 |
| CBCL08  | 0.621 |        | 0.609 |
| CBCL10  | 0.607 |        | 0.309 |
| CBCL13  | 0.542 |        | 0.475 |
| CBCL17  | 0.462 |        | 0.469 |
| CBCL41  | 0.664 |        | 0.177 |
| CBCL61  | 0.471 |        | 0.371 |
| CBCL80  | 0.518 |        | 0.370 |

---

Table S8. Means (SD), construct reliability (H), and standardised factor scores at age 11

|           | <i>p</i> | INT         | EXT         | ATT         |
|-----------|----------|-------------|-------------|-------------|
| Mean (SD) |          | 5.57 (5.17) | 5.13 (5.23) | 2.13 (2.30) |
| <i>H</i>  | 0.964    | 0.841       | 0.821       | 0.676       |
| CBCL14    | 0.523    | 0.244       |             |             |
| CBCL29    | 0.289    | 0.331       |             |             |
| CBCL30    | 0.306    | 0.395       |             |             |
| CBCL31    | 0.487    | 0.348       |             |             |
| CBCL32    | 0.242    | 0.424       |             |             |
| CBCL33    | 0.640    | 0.162       |             |             |
| CBCL35    | 0.600    | 0.325       |             |             |
| CBCL45    | 0.576    | 0.256       |             |             |
| CBCL50    | 0.460    | 0.535       |             |             |
| CBCL52    | 0.423    | 0.500       |             |             |
| CBCL71    | 0.452    | 0.416       |             |             |
| CBCL91    | 0.483    | 0.268       |             |             |
| CBCL112   | 0.466    | 0.444       |             |             |
| CBCL42    | 0.371    | 0.347       |             |             |
| CBCL65    | 0.520    | 0.142       |             |             |
| CBCL69    | 0.544    | 0.113       |             |             |
| CBCL75    | 0.164    | 0.480       |             |             |
| CBCL102   | 0.519    | 0.232       |             |             |
| CBCL103   | 0.645    | 0.325       |             |             |
| CBCL111   | 0.521    | 0.362       |             |             |
| CBCL47    | 0.403    | 0.355       |             |             |
| CBCL49    | 0.176    | 0.260       |             |             |
| CBCL51    | 0.338    | 0.468       |             |             |
| CBCL54    | 0.417    | 0.328       |             |             |
| CBCL56A   | 0.372    | 0.389       |             |             |
| CBCL56B   | 0.353    | 0.381       |             |             |
| CBCL56C   | 0.386    | 0.634       |             |             |
| CBCL56D   | 0.326    | 0.061       |             |             |
| CBCL56E   | 0.241    | 0.227       |             |             |
| CBCL56F   | 0.328    | 0.523       |             |             |
| CBCL56G   | 0.239    | 0.425       |             |             |
| CBCL26    | 0.530    |             | 0.422       |             |
| CBCL39    | 0.474    |             | 0.427       |             |
| CBCL43    | 0.516    |             | 0.520       |             |
| CBCL63    | 0.448    |             | 0.204       |             |
| CBCL67    | 0.315    |             | 0.116       |             |
| CBCL72    | 0.350    |             | 0.204       |             |
| CBCL81    | 0.384    |             | 0.661       |             |
| CBCL82    | 0.366    |             | 0.555       |             |
| CBCL90    | 0.391    |             | 0.364       |             |
| CBCL96    | 0.421    |             | 0.146       |             |

|         |       |        |       |
|---------|-------|--------|-------|
| CBCL101 | 0.303 | 0.076  |       |
| CBCL03  | 0.650 | 0.211  |       |
| CBCL16  | 0.589 | 0.390  |       |
| CBCL19  | 0.650 | -0.061 |       |
| CBCL20  | 0.616 | 0.443  |       |
| CBCL21  | 0.575 | 0.467  |       |
| CBCL22  | 0.609 | 0.418  |       |
| CBCL23  | 0.444 | 0.555  |       |
| CBCL37  | 0.579 | 0.278  |       |
| CBCL57  | 0.586 | 0.414  |       |
| CBCL68  | 0.543 | 0.261  |       |
| CBCL86  | 0.787 | 0.012  |       |
| CBCL87  | 0.771 | -0.094 |       |
| CBCL88  | 0.793 | -0.122 |       |
| CBCL89  | 0.624 | 0.047  |       |
| CBCL94  | 0.570 | 0.324  |       |
| CBCL95  | 0.675 | 0.271  |       |
| CBCL97  | 0.523 | 0.447  |       |
| CBCL104 | 0.586 | 0.193  |       |
| CBCL01  | 0.483 |        | 0.285 |
| CBCL08  | 0.554 |        | 0.687 |
| CBCL10  | 0.551 |        | 0.380 |
| CBCL13  | 0.449 |        | 0.388 |
| CBCL17  | 0.422 |        | 0.483 |
| CBCL41  | 0.632 |        | 0.315 |
| CBCL61  | 0.471 |        | 0.348 |
| CBCL80  | 0.534 |        | 0.418 |

---

Table S9. Means (SD), construct reliability (H), and standardised factor scores at age 14

|           | <i>p</i> | INT        | EXT         | ATT         |
|-----------|----------|------------|-------------|-------------|
| Mean (SD) |          | 5.57(4.99) | 4.90 (5.72) | 2.09 (2.38) |
| <i>H</i>  | 0.970    | 0.845      | 0.778       | 0.619       |
| CBCL14    | 0.535    | 0.130      |             |             |
| CBCL29    | 0.339    | 0.310      |             |             |
| CBCL30    | 0.383    | 0.286      |             |             |
| CBCL31    | 0.510    | 0.322      |             |             |
| CBCL32    | 0.175    | 0.198      |             |             |
| CBCL33    | 0.665    | 0.177      |             |             |
| CBCL35    | 0.571    | 0.314      |             |             |
| CBCL45    | 0.607    | 0.332      |             |             |
| CBCL50    | 0.501    | 0.410      |             |             |
| CBCL52    | 0.343    | 0.506      |             |             |
| CBCL71    | 0.398    | 0.381      |             |             |
| CBCL91    | 0.591    | -0.020     |             |             |
| CBCL112   | 0.488    | 0.431      |             |             |
| CBCL42    | 0.372    | 0.226      |             |             |
| CBCL65    | 0.595    | 0.217      |             |             |
| CBCL69    | 0.579    | 0.145      |             |             |
| CBCL75    | 0.197    | 0.392      |             |             |
| CBCL102   | 0.506    | 0.336      |             |             |
| CBCL103   | 0.652    | 0.308      |             |             |
| CBCL111   | 0.384    | 0.407      |             |             |
| CBCL47    | 0.423    | 0.276      |             |             |
| CBCL49    | 0.283    | 0.303      |             |             |
| CBCL51    | 0.308    | 0.481      |             |             |
| CBCL54    | 0.397    | 0.384      |             |             |
| CBCL56A   | 0.323    | 0.432      |             |             |
| CBCL56B   | 0.317    | 0.491      |             |             |
| CBCL56C   | 0.373    | 0.633      |             |             |
| CBCL56D   | 0.228    | 0.091      |             |             |
| CBCL56E   | 0.234    | 0.262      |             |             |
| CBCL56F   | 0.183    | 0.676      |             |             |
| CBCL56G   | 0.161    | 0.494      |             |             |
| CBCL26    | 0.669    |            | 0.157       |             |
| CBCL39    | 0.565    |            | 0.388       |             |
| CBCL43    | 0.655    |            | 0.260       |             |
| CBCL63    | 0.440    |            | 0.163       |             |
| CBCL67    | 0.502    |            | 0.408       |             |
| CBCL72    | 0.402    |            | 0.315       |             |
| CBCL81    | 0.565    |            | 0.437       |             |
| CBCL82    | 0.576    |            | 0.533       |             |
| CBCL90    | 0.604    |            | 0.204       |             |
| CBCL96    | 0.526    |            | 0.159       |             |

|         |       |        |       |
|---------|-------|--------|-------|
| CBCL101 | 0.389 | 0.546  |       |
| CBCL105 | 0.410 | 0.521  |       |
| CBCL106 | 0.463 | 0.486  |       |
| CBCL03  | 0.647 | -0.069 |       |
| CBCL16  | 0.644 | 0.191  |       |
| CBCL19  | 0.673 | -0.005 |       |
| CBCL20  | 0.646 | 0.363  |       |
| CBCL21  | 0.666 | 0.390  |       |
| CBCL22  | 0.715 | 0.134  |       |
| CBCL23  | 0.601 | 0.388  |       |
| CBCL37  | 0.697 | 0.305  |       |
| CBCL57  | 0.617 | 0.291  |       |
| CBCL68  | 0.669 | 0.055  |       |
| CBCL86  | 0.777 | -0.225 |       |
| CBCL87  | 0.745 | -0.254 |       |
| CBCL88  | 0.727 | -0.075 |       |
| CBCL89  | 0.638 | 0.188  |       |
| CBCL94  | 0.601 | 0.148  |       |
| CBCL95  | 0.720 | 0.115  |       |
| CBCL97  | 0.564 | 0.313  |       |
| CBCL104 | 0.644 | 0.073  |       |
| CBCL01  | 0.495 |        | 0.300 |
| CBCL08  | 0.577 |        | 0.644 |
| CBCL10  | 0.518 |        | 0.493 |
| CBCL13  | 0.519 |        | 0.331 |
| CBCL17  | 0.524 |        | 0.399 |
| CBCL41  | 0.670 |        | 0.244 |
| CBCL61  | 0.578 |        | 0.211 |
| CBCL80  | 0.499 |        | 0.256 |

---
